# Supplementary material for: Protein Glycopatterns in Bronchoalveolar Lavage Fluid as Novel Potential Biomarkers for Diagnosis of Lung Cancer
Source: PubMed Central journal article supplement (PMC7840895; doi:10.3389/fonc.2020.568433), 2021-01-14
Supplement: DataSheet_1.pdf [file DataSheet_1.pdf]

## *Supplementary Material*

**Table S1.** The glycan specificities of 37 lectins.

| Lectin  | Specificity                                                                                                                                                                               |
|---------|-------------------------------------------------------------------------------------------------------------------------------------------------------------------------------------------|
| Jacalin | Gal $\beta$ 1-3GalNAc $\alpha$ -Ser/Thr(T), GalNAc $\alpha$ -Ser/Thr(Tn), GlcNAc $\beta$ 1-3-GalNAc $\alpha$ -Ser/Thr(Core3), sialyl-T(ST). not bind to Core2, Core6, and sialyl-Tn (STn) |
| ECA     | Gal $\beta$ -1,4GlcNAc (type II), Gal $\beta$ 1-3GlcNAc (type I)                                                                                                                          |
| HHL     | High-Mannose, Man $\alpha$ 1-3Man, Man $\alpha$ 1-6Man, Man5-GlcNAc2-Asn                                                                                                                  |
| WFA     | terminating in GalNAc $\alpha$ / $\beta$ 1-3/6Gal                                                                                                                                         |
| GSL-II  | GlcNAc and agalactosylated tri/tetra antennary glycans                                                                                                                                    |
| MAL-II  | Sia $\alpha$ 2-3Gal $\beta$ 1-4Glc(NAc)/Glc, Sia $\alpha$ 2-3Gal, Sia $\alpha$ 2-3, Sia $\alpha$ 2-3GalNAc                                                                                |
| PHA-E   | Bisecting GlcNAc, biantennary complex-type N-glycan with outer Gal                                                                                                                        |
| PTL-I   | GalNAc, GalNAc $\alpha$ -1,3Gal, GalNAc $\alpha$ -1,3Gal $\beta$ -1,3/4Glc                                                                                                                |
| SJA     | $\alpha$ GalNAc, $\alpha$ Gal, anti-A and BTerminal in GalNAc and Gal, anti-A and anti-B human blood group                                                                                |
| PNA     | Gal $\beta$ 1-3GalNAc $\alpha$ -Ser/Thr(T)                                                                                                                                                |
| EEL     | Gal $\alpha$ 1-3(Fuca1-2)Gal (blood group B antigen)                                                                                                                                      |
| AAL     | Fuca1-6 GlcNAc(core fucose), Fuca1-3(Gal $\beta$ 1-4)GlcNAc                                                                                                                               |
| LTL     | Fuca1-2Gal $\beta$ 1-4GlcNAc, Fuca1-3(Gal $\beta$ 1-4)GlcNAc, anti-H blood group specificity                                                                                              |
| MPL     | Gal $\beta$ 1-3GalNAc, GalNAc                                                                                                                                                             |
| LEL     | (GlcNAc) $n$ , high mannose-type N-glycans                                                                                                                                                |
| GSL-I   | $\alpha$ GalNAc, $\alpha$ Gal, anti-A and B                                                                                                                                               |
| DBA     | $\alpha$ GalNAc, Tn antigen, GalNAc $\alpha$ 1-3((Fuca1-2))Gal (blood group A antigen)                                                                                                    |
| LCA     | $\alpha$ -D-Man, Fuca1-6GlcNAc, $\alpha$ -D-Glc                                                                                                                                           |
| RCA120  | $\beta$ -Gal, Gal $\beta$ -1,4GlcNAc (type II), Gal $\beta$ 1-3GlcNAc (type I)                                                                                                            |
| STL     | trimers and tetramers of GlcNAc, core (GlcNAc) of N-glycan, oligosaccharide containing GlcNAc and MurNAc                                                                                  |
| BS-I    | $\alpha$ -Gal, $\alpha$ -GalNAc, Gal $\alpha$ -1,3Gal, Gal $\alpha$ -1,6Glc                                                                                                               |
| ConA    | High-Mannose, Man $\alpha$ 1-6(Man $\alpha$ 1-3)Man, terminal GlcNAc                                                                                                                      |
| PTL-II  | Gal, blood group H, T-antigen                                                                                                                                                             |
| DSA     | $\beta$ -D-GlcNA, (GlcNAc $\beta$ 1-4) $n$ , Gal $\beta$ 1-4GlcNAc                                                                                                                        |
| SBA     | $\alpha$ - or $\beta$ -linked terminal GalNAc, (GalNAc) $n$ , GalNAc $\alpha$ 1-3Gal, blood-group A antigen                                                                               |
| VVA     | terminal GalNAc, GalNAc $\alpha$ -Ser/Thr(Tn), GalNAc $\alpha$ 1-3Gal                                                                                                                     |
| NPA     | High-Mannose, Man $\alpha$ 1-6Man                                                                                                                                                         |
| PSA     | $\alpha$ -D-Man, Fuca1-6GlcNAc, $\alpha$ -D-Glc                                                                                                                                           |
| ACA     | Gal $\beta$ 1-3GalNAc $\alpha$ -Ser/Thr (T antigen), sialyl-T(ST) tissue staining patterns are markedly different than those obtained with either PNA or Jacalin                          |
| WGA     | Multivalent Sia and (GlcNAc) $n$                                                                                                                                                          |
| UEA-I   | Fuca1-2Gal $\beta$ 1-4Glc(NAc)                                                                                                                                                            |
| PWM     | Branched (LacNAc) $n$                                                                                                                                                                     |
| MAL-I   | Gal $\beta$ -1,4GlcNAc, Sia $\alpha$ 2-3Gal, Gal $\beta$ 1-3GlcNAc, Sia $\alpha$ 2-3                                                                                                      |
| GNA     | High-Mannose, Man $\alpha$ 1-3Man                                                                                                                                                         |
| BPL     | Gal $\beta$ 1-3GalNAc, Terminal GalNAc                                                                                                                                                    |
| PHA-E+L | Bisecting GlcNAc, bi-antennary N-glycans, tri- and tetra-antennary complex-type N-glycan                                                                                                  |
| SNA     | Sia2-6Gal/GalNAc                                                                                                                                                                          |
